# Supplementary material for: Functional and pharmacological evaluation of a novel SCN2A variant linked to early‐onset epilepsy
Source: PubMed Central journal article supplement — Ann Clin Transl Neurol. 2020 Aug 4;7(9):1488–501. doi: 10.1002/acn3.51105 (PMC7480906; doi:10.1002/acn3.51105), 2020-08-04
Supplement: ACN3-7-1488-s001.pdf [file ACN3-7-1488-s001.pdf]

# Functional and Pharmacological Evaluation of a Novel *SCN2A* Variant Linked to Early-onset Epilepsy

Scott K. Adney, John J. Millichap, Jean-Marc DeKeyser, Tatiana Abramova,  
Christopher H. Thompson, and Alfred L. George, Jr.

## SUPPLEMENTAL INFORMATION

### 1. Supplemental Figures

- Fig. S1 Functional properties of M1879T channels in either the Nav<sub>v</sub>1.2 neonatal or adult splice variants.
- Fig. S2 Time dependence of resurgent current in WT and M1879T Nav<sub>v</sub>1.2 channels.
- Fig. S3 Effects of carbamazepine on WT Nav<sub>v</sub>1.2 channels.
- Fig. S4 Effect of carbamazepine on resurgent current.

### 2. Supplemental Tables

- Table S1 Atomic contacts of Met-1879 from WT and Thr-1879 from M1879T model
- Table S2 Atomic contacts of Arg-1882 from WT and Gln-1882 from R1882Q model

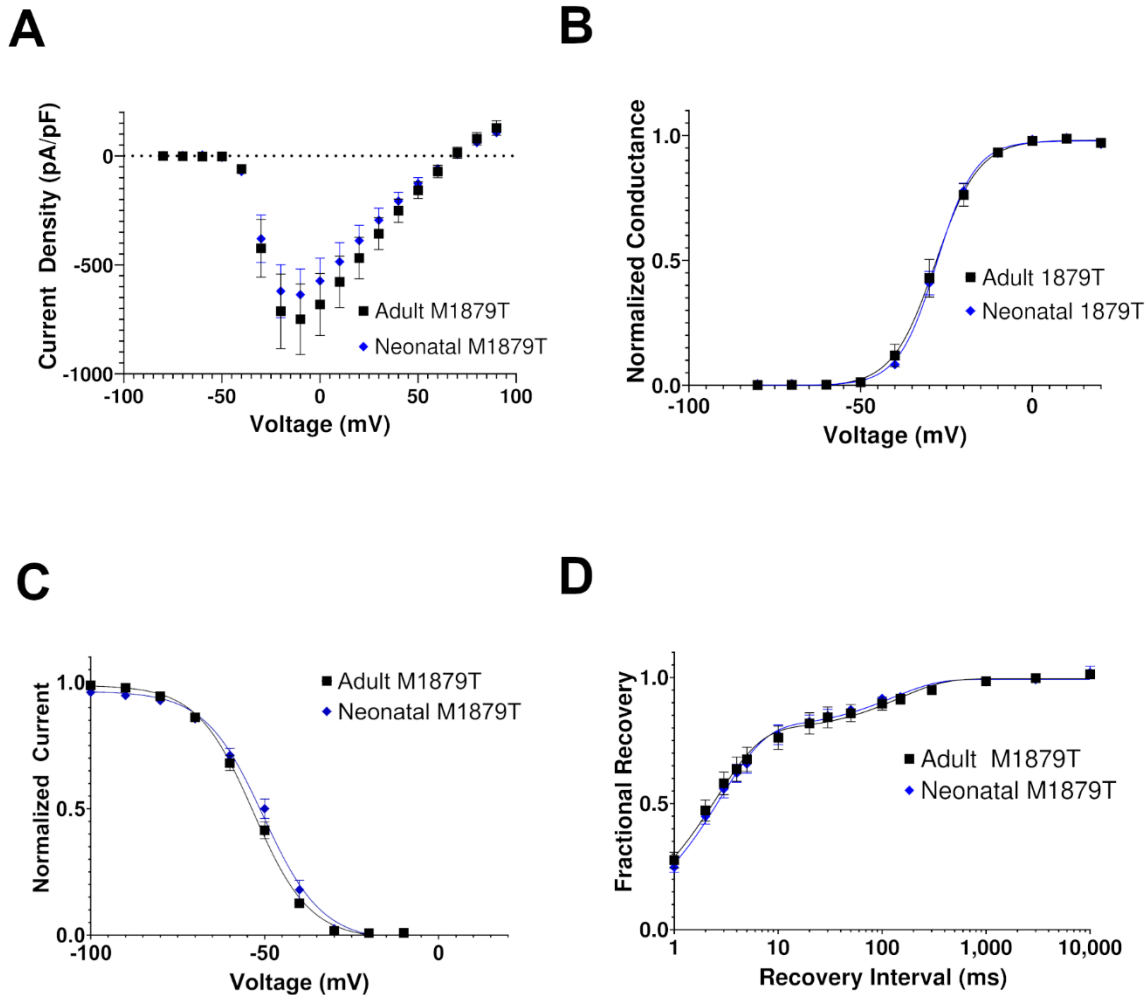

**Fig. S1. Functional properties of M1879T channels in either the  $Na_v1.2$  neonatal or adult splice variant.**

(A) Current density-voltage plot of adult ( $n=8$ ) and neonatal ( $n=15$ ) isoforms of M1879T. (B) Voltage-dependence of activation for adult ( $n=14$ ) and neonatal ( $n=12$ ) isoforms of M1879T. No significant differences were observed between  $V_{1/2}$  values (see Table 1). (C) Voltage-dependence of inactivation for adult ( $n=25$ ) and neonatal ( $n=15$ ) isoforms of M1879T. No significant differences were observed between  $V_{1/2}$  values. (D) Logarithmic plot of the time course of recovery from inactivation comparing adult ( $n=10$ ) and neonatal ( $n=11$ ) isoforms of M1879T.

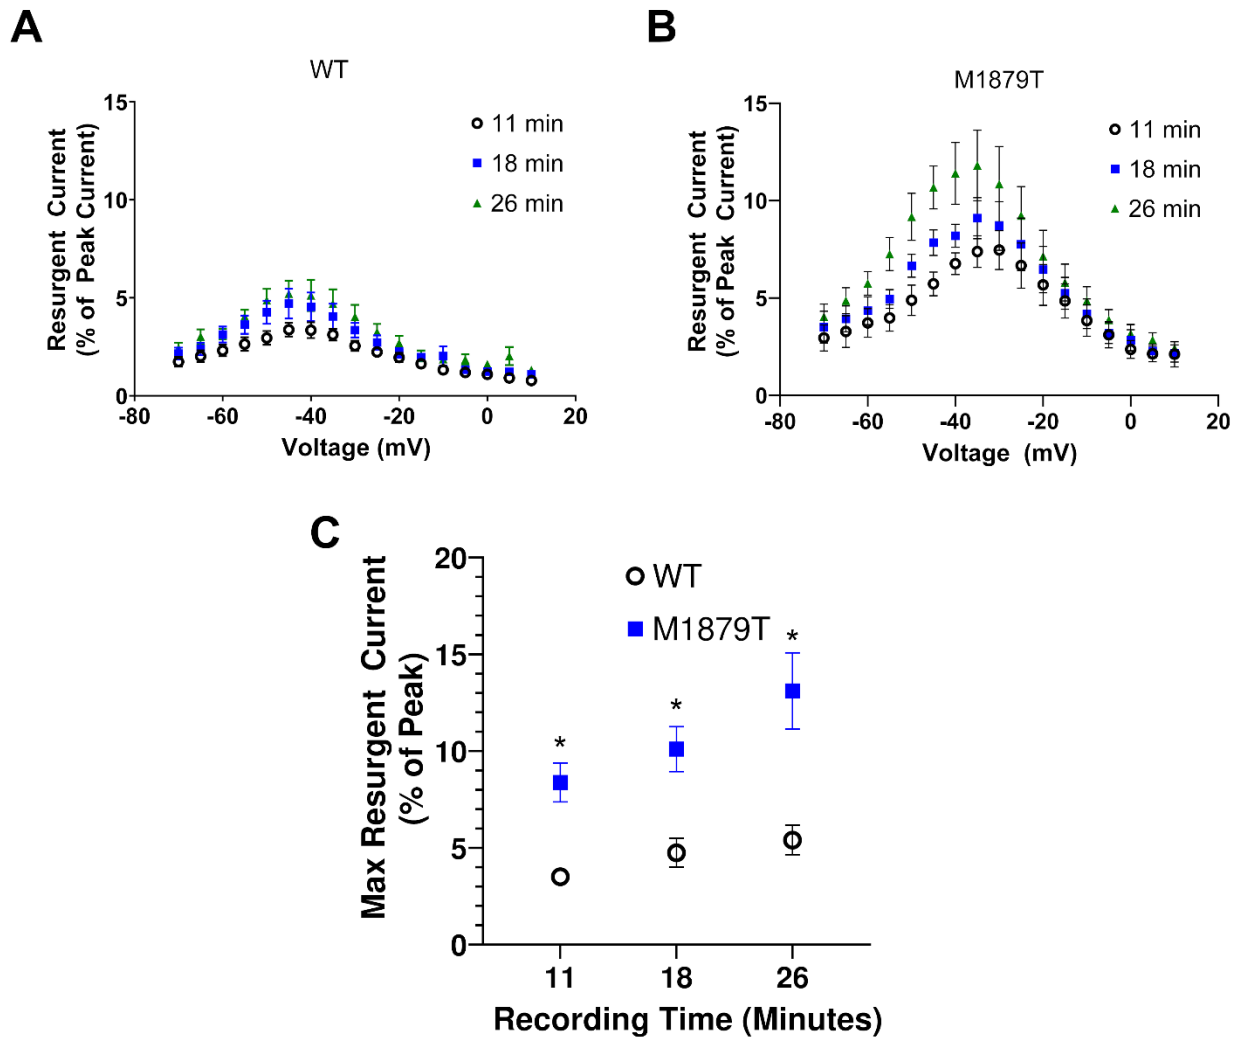

**Fig. S2. Time dependence of resurgent current in WT and M1879T  $Na_v1.2$  channels.**

(A) Voltage-dependence of WT  $Na_v1.2$  resurgent current (as % of peak current) at three different recording time-points. (B) Voltage-dependence of M1879T  $Na_v1.2$  resurgent current at the same three recording time-points. (C) Summary plot showing peak resurgent current (as % of peak current) at each time point for WT (n=6) and M1879T (n=7) channels. \*,  $p < 0.05$  by Mann-Whitney U test.

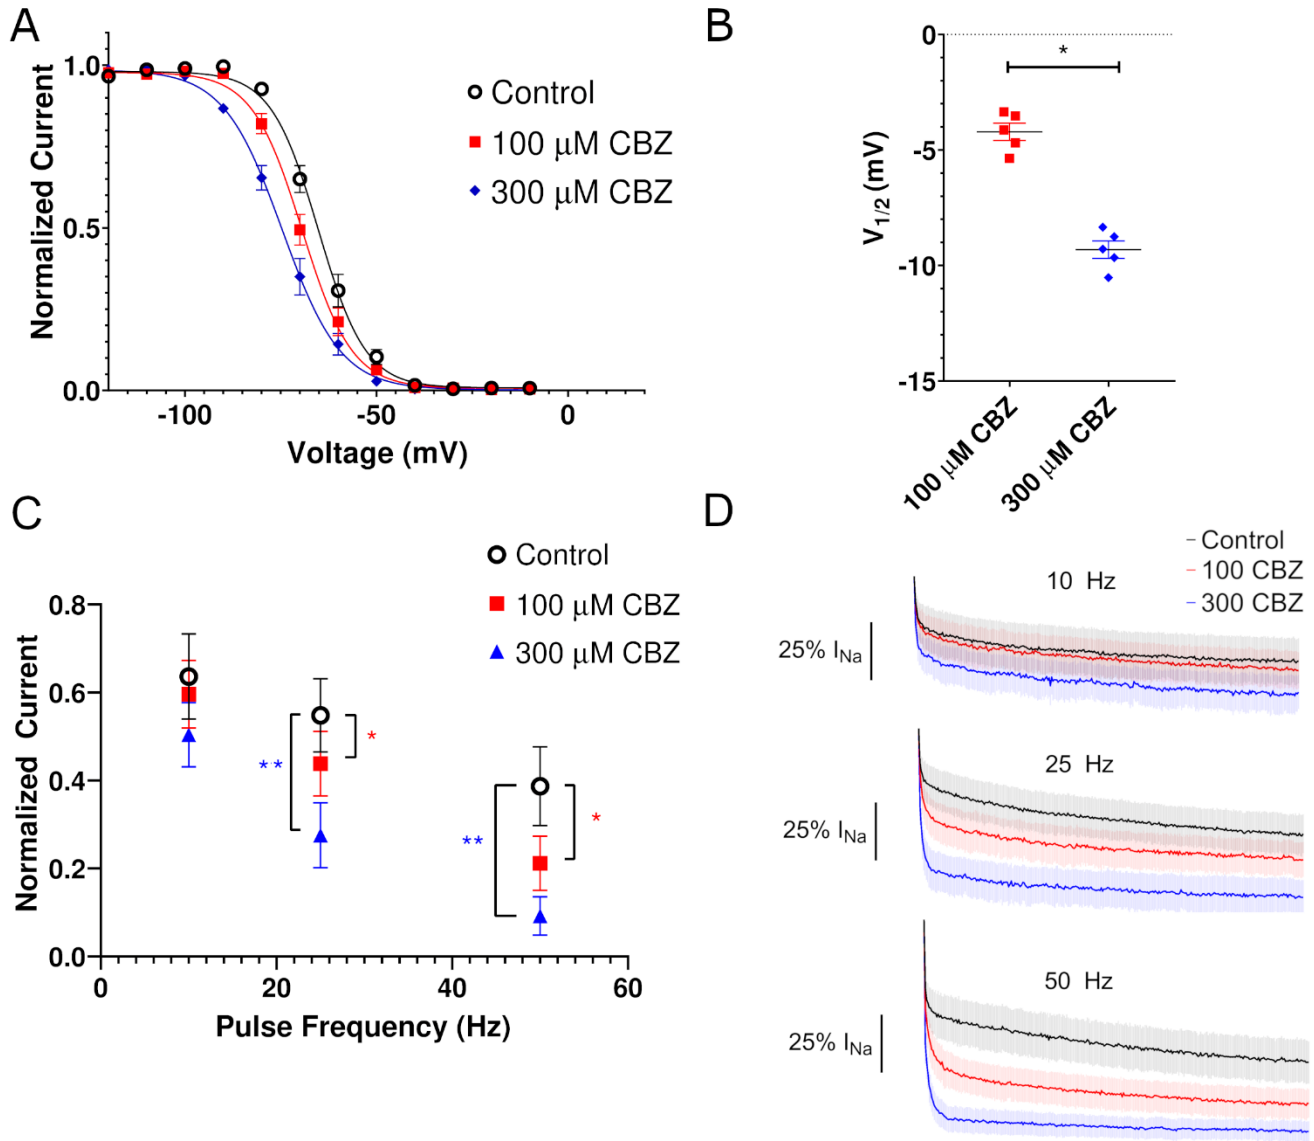

**Fig. S3. Effects of carbamazepine on WT  $Na_v1.2$  channels.**

(A) Carbamazepine (CBZ) induces a hyperpolarizing shift of the voltage-dependence of inactivation ( $n=5$ ). (B) Plot of change in inactivation  $V_{1/2}$  in response to 100  $\mu$ M and 300  $\mu$ M carbamazepine ( $n=5$ ; \*,  $p<0.05$  by paired t-test). (C) Plot of residual current (comparing 300<sup>th</sup> pulse to 1<sup>st</sup> pulse) after 0 mV pulses at the indicated frequency with a holding potential of -90 mV. There was a significant difference in residual current at 100  $\mu$ M (\*) and 300  $\mu$ M (\*\*) at 25 Hz and 50 Hz compared to the control value ( $p<0.05$ , one-way ANOVA with repeated measures and Dunnett's post-hoc test,  $n=5$ ). (D) Average time-course of CBZ treated cells at 10 Hz (top), 25 Hz (middle), and 50 Hz (bottom). The shaded area indicates the SEM.

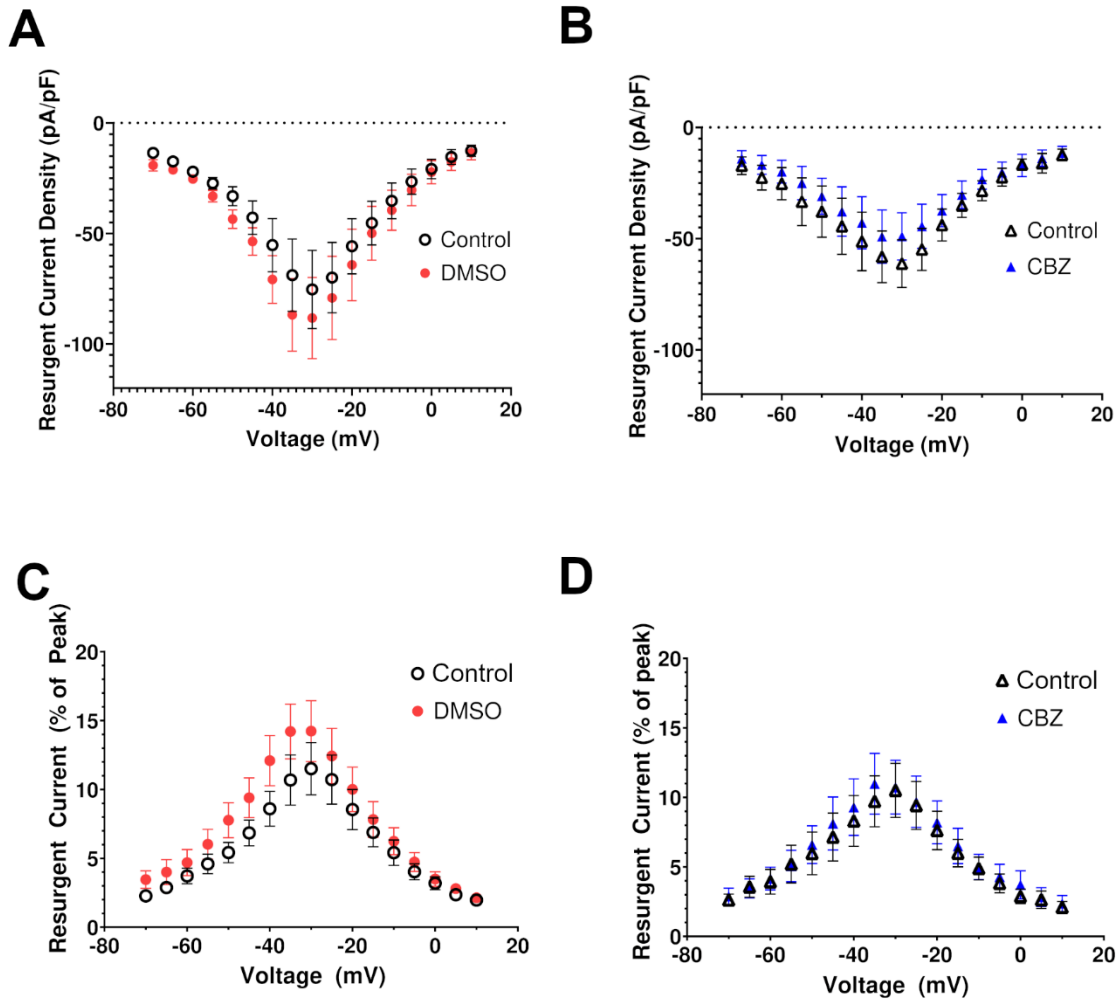

**Fig. S4. Effect of carbamazepine on resurgent current.**

(A) Voltage-dependence of resurgent current density in the control condition and after DMSO (vehicle) treatment (n=7). (B) Voltage-dependence of resurgent current density in the control condition and after 300  $\mu$ M CBZ treatment (n=7). (C) Resurgent current as percentage of peak vs. voltage in control and after 300  $\mu$ M CBZ treatment (n=7).

**Table S1. Atomic contacts of Met-1879 from WT and Thr-1879 from M1879T model**

| <b>Met-1879: 15 contacts</b> |                |                |                 |
|------------------------------|----------------|----------------|-----------------|
| <b>Atom1</b>                 | <b>Atom2</b>   | <b>Overlap</b> | <b>Distance</b> |
| MET 1879.B CE                | LEU 1875.B CG  | 0.275          | 3.485           |
| MET 1879.B CE                | THR 1862.B CG2 | 0.255          | 3.505           |
| MET 1879.B CE                | THR 1862.B OG1 | 0.197          | 3.143           |
| MET 1879.B CG                | LEU 1875.B O   | 0.164          | 3.136           |
| MET 1879.B CE                | THR 1862.B CB  | 0.142          | 3.618           |
| MET 1879.B CE                | LEU 1875.B CD2 | 0.132          | 3.628           |
| MET 1879.B CE                | PHE 1795.B CE1 | 0.061          | 3.579           |
| MET 1879.B SD                | LEU 1875.B O   | -0.15          | 3.34            |
| MET 1879.B CB                | PHE 1859.B CE1 | -0.168         | 3.808           |
| MET 1879.B CB                | LEU 1875.B O   | -0.184         | 3.484           |
| MET 1879.B CE                | PHE 1795.B CZ  | -0.215         | 3.855           |
| MET 1879.B CE                | LEU 1875.B CD1 | -0.287         | 4.047           |
| MET 1879.B SD                | PHE 1859.B CD1 | -0.298         | 3.828           |
| MET 1879.B SD                | LEU 1875.B CG  | -0.306         | 3.956           |
| MET 1879.B SD                | ARG 1876.B CA  | -0.343         | 3.993           |
|                              |                |                |                 |
| <b>Thr-1879: 6 contacts</b>  |                |                |                 |
| THR 1879.B CG2               | LEU 1858.B CD1 | 0.434          | 3.326           |
| THR 1879.B OG1               | LEU 1875.B O   | 0.193          | 2.687           |
| THR 1879.B CG2               | LEU 1855.B CD1 | 0.112          | 3.648           |
| THR 1879.B CB                | LEU 1875.B O   | -0.056         | 3.356           |
| THR 1879.B CB                | PHE 1859.B CE1 | -0.271         | 3.911           |
| THR 1879.B CG2               | PHE 1859.B CE1 | -0.38          | 4.02            |

**Table S2. Atomic contacts of Arg-1882 from WT and Gln-1882 from R1882Q model**

| <b>Arg-1882: 12 contacts</b> |                |                |                 |
|------------------------------|----------------|----------------|-----------------|
| <b>Atom1</b>                 | <b>Atom2</b>   | <b>Overlap</b> | <b>Distance</b> |
| ARG 1882.B NH1               | GLU 1792.B OE2 | 0.382          | 2.678           |
| ARG 1882.B NH1               | GLU 1792.B CD  | 0.37           | 3.15            |
| ARG 1882.B CG                | GLN 1878.B O   | 0.239          | 3.061           |
| ARG 1882.B NH1               | GLU 1792.B OE1 | 0.188          | 2.872           |
| ARG 1882.B NH2               | GLU 1792.B OE1 | 0.159          | 2.901           |
| ARG 1882.B NH2               | GLN 1878.B OE1 | 0.096          | 2.964           |
| ARG 1882.B CB                | GLN 1878.B O   | 0.08           | 3.22            |
| ARG 1882.B CD                | GLN 1878.B O   | -0.108         | 3.408           |
| ARG 1882.B NH2               | GLU 1792.B CD  | -0.227         | 3.747           |
| ARG 1882.B CZ                | GLU 1792.B OE1 | -0.301         | 3.331           |
| ARG 1882.B NE                | GLN 1878.B OE1 | -0.319         | 3.379           |
| ARG 1882.B CZ                | GLU 1792.B CD  | -0.363         | 3.853           |
| <b>Gln-1882: 2 contacts</b>  |                |                |                 |
| GLN 1882.B CG                | GLN 1878.B O   | 0.128          | 3.172           |
| GLN 1882.B CB                | GLN 1878.B O   | -0.02          | 3.32            |
